# Supplementary material for: Methylation alteration of SHANK1 as a predictive, diagnostic and prognostic biomarker for chronic lymphocytic leukemia
Source: PubMed Central journal article supplement (PMC6697638; doi:10.18632/oncotarget.27080), 2019-08-13
Supplement: oncotarget-10-4987-s001.pdf [file oncotarget-10-4987-s001.pdf]

## **Methylation alteration of *SHANK1* as a predictive, diagnostic and prognostic biomarker for chronic lymphocytic leukemia**

### **SUPPLEMENTARY MATERIALS**

**Supplementary Table 1:** 100-top ranked differentially methylated CpG islands in CLL discovery set

**See Supplementary Table 1**
